# Supplementary material
Source: Springer Nature journal article supplement (https://www.springermedizin.de/resource/supplementary/12891_2013_2406_MOESM3_ESM.pdf/9509550)
Supplement: MOESM3 [file 9509550]

| Visit                                               | Screening                                                                            | Baseline            | Visit 1 - Treatment | Visit 2 - Treatment | Visit 3 - Assessment | Visit 4 - Midpoint assessment  | Visit 5 - Treatment  | Visit 6 - Treatment | Visit 7 - Assessment | Visit 8 - End of study assessment |
|-----------------------------------------------------|--------------------------------------------------------------------------------------|---------------------|---------------------|---------------------|----------------------|--------------------------------|----------------------|---------------------|----------------------|-----------------------------------|
| Assessment (Procedure / Activity)                   | Week -4 (+14 days)                                                                   | Week -2 (+ 14 days) | Week 0              | Week 2 (+ 7 days)   | Week 16 (+/- 7 days) | Week 24 (-7 days) <sup>4</sup> | Week 24 (+/- 7 days) | Week 26 (+ 7 days)  | Week 36 (+/- 7 days) | Week 48 (+/- 7 days)              |
| Informed consent & Registration                     | x                                                                                    |                     |                     |                     |                      |                                |                      |                     |                      |                                   |
| Randomisation                                       |                                                                                      | x                   |                     |                     |                      |                                |                      |                     |                      |                                   |
| Rituximab / placebo                                 |                                                                                      |                     | x                   | x                   |                      |                                | x                    | x                   |                      |                                   |
| Vital signs                                         |                                                                                      |                     | x                   | x                   |                      |                                | x                    | x                   |                      |                                   |
| Demographics & Medical History                      | x <sup>1</sup>                                                                       |                     |                     |                     |                      |                                |                      |                     |                      |                                   |
| Pregnancy Test                                      | x                                                                                    |                     |                     |                     |                      | x                              |                      |                     |                      | x                                 |
| Physical examination                                |                                                                                      | x                   |                     |                     |                      | x                              |                      |                     |                      | x                                 |
| Chest X-ray & ECG                                   | x <sup>5</sup>                                                                       |                     |                     |                     |                      |                                |                      |                     |                      | x                                 |
| VAS Scales (Fatigue & Oral dryness)                 | x                                                                                    |                     |                     |                     |                      |                                |                      |                     |                      |                                   |
| Unstimulated Whole Salivary flow                    | x                                                                                    |                     |                     |                     | x                    | x                              |                      |                     | x                    | x                                 |
| Stimulated Whole Salivary flow                      |                                                                                      | x                   |                     |                     | x                    | x                              |                      |                     | x                    | x                                 |
| Schirmers I test                                    |                                                                                      | x                   |                     |                     | x                    | x                              |                      |                     | x                    | x                                 |
| Patient and Physician Questionnaires                |                                                                                      | x                   |                     |                     | x                    | x                              |                      |                     | x                    | x                                 |
| Health Economics Patient & Physician Questionnaires |                                                                                      |                     |                     |                     | x                    | x                              |                      |                     | x                    | x                                 |
| Local Samples                                       |                                                                                      |                     |                     |                     |                      |                                |                      |                     |                      |                                   |
| Immunology bloods 1 (IB1)                           | x                                                                                    |                     |                     |                     | x <sup>7</sup>       | x <sup>7</sup>                 |                      |                     | x <sup>7</sup>       | x <sup>7</sup>                    |
| Routine blood tests 1 (RB1)                         | x <sup>5</sup>                                                                       |                     |                     |                     | x                    | x                              |                      |                     | x                    | x                                 |
| Routine blood tests 2 (RB2)                         |                                                                                      |                     |                     | x                   |                      |                                |                      | x                   |                      |                                   |
| Routine blood tests 3 (RB3)                         | x                                                                                    |                     |                     |                     |                      | x                              |                      |                     |                      | x                                 |
| Routine blood tests 4 (RB4)                         | x                                                                                    |                     |                     |                     |                      |                                |                      |                     |                      |                                   |
| Bence-Jones Protein                                 | x                                                                                    |                     |                     |                     |                      | x                              |                      |                     |                      | x                                 |
| Central Samples                                     |                                                                                      |                     |                     |                     |                      |                                |                      |                     |                      |                                   |
| Immunology bloods 2 (IB2)                           |                                                                                      | x <sup>2</sup>      |                     |                     | x                    | x                              |                      |                     | x                    | x                                 |
| Immunology bloods 3 (IB3)                           |                                                                                      | x                   |                     |                     |                      | x                              |                      |                     |                      | x                                 |
| Immunology bloods 4 (IB4)                           |                                                                                      | x                   |                     |                     | x                    | x                              |                      |                     | x                    | x                                 |
| Biobank sample 1 (BB1)                              |                                                                                      | x                   |                     |                     |                      |                                |                      |                     |                      |                                   |
| Biobank sample 3 (BB3)                              |                                                                                      | x                   |                     |                     | x                    | x                              |                      |                     | x                    | x                                 |
| Safety evaluation                                   | Monitor during study treatment and 30 days after the last dose of protocol treatment |                     |                     |                     |                      |                                |                      |                     |                      |                                   |
| Labial gland biopsy (BB2 <sup>3</sup> )             |                                                                                      | x                   |                     |                     | x                    |                                |                      |                     |                      | x                                 |
| Salivary gland ultrasound scans <sup>3</sup>        |                                                                                      | x                   |                     |                     | x                    |                                |                      |                     |                      | x                                 |

<sup>1</sup>Includes inclusion and exclusion criteria, medications and co-morbidity.

<sup>2</sup>Repeat cryoglobulins at week 24 and week 48 if abnormal result is obtained at baseline.

<sup>3</sup>An extra visit may be scheduled for this optional procedure (procedure only be performed in consenting patients at centres with specialist facilities).

<sup>4</sup>Midpoint assessments must be performed within 7 days prior to dosing at week 24.

<sup>5</sup>Additional tests only if clinically indicated (Coombs test, eGFR, urinary albumin-creatinine ratio, blood glucose).

<sup>6</sup>Chest X-ray to be performed at screening unless one is available within the previous 6 months were results were normal.

<sup>7</sup>IgG and C3/C4 only to be analysed locally.

### Key to blood samples in the study schedule:

- Immunology Bloods 1 (IB1) = RF, IgG, IgA, IgM + EP, anti-Ro/La, C3/C4, b2microglobulin, anti-TTG screen - analysed locally
- Immunology Bloods 2 (IB2) = RF, anti-Ro/La, IgG, IgA, IgM + EP, C3/C4, ANA, dsDNA, b2microglobulin, - analysed centrally
- Immunology Bloods 3 (IB3) = Functional antibodies, HACA, BlyS/BAFF – analysed centrally
- Immunology Bloods 4 (IB4) = FACS, CD4/8 T-cell microarray - analysed centrally
- Routine Bloods 1 (RB1) = U&E, creatinine, LFTs, CRP, CPK, FBC, ESR, urine dipstick - analysed locally
- Routine Bloods 2 (RB2) = FBC, creatinine, LFTs - analysed locally
- Routine Bloods 3 (RB3) = Thyroid-stimulating hormone (TSH) - analysed locally
- Routine Bloods 4 (RB4) = Hepatitis B & C screen - analysed locally
- Biobank samples (BB1) =, PAX gene DNA - analysed centrally
- Biobank sample (BB2) = PAX gene RNA from biopsy – analysed centrally
- Biobank sample (BB3) = Serum PAX gene RNA – analysed centrally
- Bence-Jones Protein = Urine sample - analysed locally
